1 An agent-based model of cattle grazing toxic Geyer's larkspur

2

3 Kevin E. Jablonski<sup>1\*</sup>, Randall B. Boone<sup>2</sup>, Paul J. Meiman<sup>1</sup>

4

5 <sup>1</sup>Department of Forest and Rangeland Stewardship, Colorado State University, Fort Collins,

6 Colorado, United States of America.

7 <sup>2</sup>Natural Resource Ecology Laboratory, Colorado State University, Fort Collins, Colorado, United

8 States of America

9

10 \* Corresponding author

11 Email: [kevin.jablonski@colostate.edu](mailto:kevin.jablonski@colostate.edu)

## 12 **Abstract**

13 By killing cattle and otherwise complicating management, the many species of larkspur  
14 (*Delphinium* spp.) present a serious, intractable, and complex challenge to livestock grazing  
15 management in the western United States. Among the many obstacles to improving our  
16 understanding of cattle-larkspur dynamics has been the difficulty of testing different grazing  
17 management strategies in the field, as the risk of dead animals is too great. Agent-based models  
18 (ABMs) provide an effective method of testing alternate management strategies without risk to  
19 livestock. ABMs are especially useful for modeling complex systems such as livestock grazing  
20 management, and allow for realistic bottom-up encoding of cattle behavior. Here, we introduce a  
21 spatially-explicit, behavior-based ABM of cattle grazing in a pasture with a dangerous amount of  
22 Geyer's larkspur (*D. geyeri*). This model tests the role of herd cohesion and stocking density in  
23 larkspur intake, finds that both are key drivers of larkspur-induced toxicosis, and indicates that  
24 alteration of these factors within realistic bounds can mitigate risk. Crucially, the model points to  
25 herd cohesion, which has received little attention in the discipline, as playing an important role in  
26 lethal acute toxicosis. As the first ABM to model grazing behavior at realistic scales, this study also  
27 demonstrates the tremendous potential of ABMs to illuminate grazing management dynamics,  
28 including fundamental aspects of livestock behavior amidst ecological heterogeneity.

29

## 30 **Introduction**

31 The many species of larkspur (*Delphinium* spp. L.) present a serious, intractable, and complex  
32 challenge to livestock grazing management in the western United States [1–3]. Larkspur plants  
33 contain numerous norditerpinoid alkaloids, which are potent neuromuscular paralytics that, for  
34 reasons that are not entirely understood, are particularly effective at killing cattle, with yearly herd  
35 losses estimated at 2-5% for those grazing in larkspur habitat [3,4]. To avoid such losses, producers

36 will often abandon or delay grazing in pastures with larkspur, which creates a substantial opportunity  
37 cost and an impediment to achieving management objectives [1,4].

38         Among the many challenges to improving our understanding of cattle-larkspur dynamics has  
39 been the difficulty of testing different grazing management strategies in the field. Not only is risking  
40 dead cattle impractical and unethical, but the complexity of livestock grazing management, especially  
41 when considered across the wide range of habitats and management regimes in which larkspur is  
42 found, suggests that results from individual field experiments would be unlikely to be broadly useful  
43 anyway [5,6]. What is needed instead is a method of realistically testing grazing management  
44 strategies without risk to livestock and with the flexibility to test multiple scenarios. Agent-based  
45 models (ABMs) provide such a method.

46         ABMs are computational simulation tools that focus on the behavior of individual “agents”  
47 as they interact with one another and the environment [7]. They differ from other types of  
48 simulation models in being bottom-up (versus top-down) with group-level behaviors emerging from  
49 (usually) realistic individual behaviors rather than deterministic formulae [8]. ABMs are thus  
50 particularly useful in modeling complex systems, where the results of the interactions among system  
51 elements are not easily predicted or understood [9,10]. Indeed, it has been suggested that bottom-  
52 up-simulation may be the best way to increase our understanding of complex systems, which is one  
53 of the most important challenges confronting modern science [9,11,12].

54         As noted by Dumont and Hill [11], ABMs are “particularly suited to simulate the behavior of  
55 groups of herbivores foraging within a heterogeneous environment”. The authors encourage the use  
56 of ABMs in situations where experimentation is impractical, and those where comparison of  
57 different management strategies is needed. Despite this encouragement, and despite the growing  
58 enthusiasm for ABMs in other disciplines, they have been little used in livestock grazing  
59 management research, despite the existence of relevant studies to parameterize such a model [e.g.,

60 13–18]. This is at least partly due to confusion about the purpose and role of models in improving  
61 our understanding of complex systems.

62 Models can never be complete simulacra, and do not need to be in order to be useful.  
63 Instead, “models are neither true nor false but lie on a continuum of usefulness for which credibility  
64 can be built up only gradually” [19]. This credibility is built not just by model output but also, more  
65 importantly, through thoughtful model development. This ensures that the necessary simplification  
66 that occurs in modeling focuses in on rather than obscures the system processes of interest [20]. As  
67 noted by Augusiak et al. [19], in well-designed models the important question is the extent to which  
68 the model achieves its purpose in the light of existing evidence, rather than a binary yes or no  
69 regarding its validity.

70 Previous research into the relationship between grazing management and larkspur toxicosis  
71 has largely focused on timing of grazing, with some attention paid to mineral supplementation, pre-  
72 grazing with sheep, and, increasingly, genetic susceptibility [3,4,21–24]. Some papers have suggested  
73 that cattle behavior, influenced by management, can play a role in mitigating larkspur deaths [25,26],  
74 but these ideas have received little empirical study. Only anecdotally has it been observed that,  
75 regardless of timing of grazing, it may be possible to eliminate losses to larkspur by increasing  
76 stocking density, due to a dilution effect (same amount of alkaloids, more cattle) or perhaps changes  
77 in herd behavior [27].

78 In this paper, we introduce a spatially-explicit, behavior-based ABM of cattle grazing in a  
79 pasture with a dangerous amount of Geyer’s larkspur (*Delphinium geyeri* Green), in which MSAL-type  
80 alkaloids are the dominant toxin [28,29]. This model provides significant management-relevant  
81 insight for producers dealing with larkspur and demonstrates the great potential of ABMs to credibly  
82 model livestock grazing management dynamics, including fundamental aspects of livestock behavior  
83 amidst ecological heterogeneity.

## 84 **Methods**

85           The model description follows the updated Overview, Design Concepts, and Details (ODD)  
86 protocol, an accepted method for standardizing published descriptions of ABMs [30].

## 87 **Purpose**

88           We developed this model to test the effect of co-varying instantaneous stocking density [31]  
89 and herd cohesion (also known as troop length) [32] on cases of lethal acute alkaloid toxicosis  
90 caused by *D. geyeri*. Cases of lethal acute toxicosis are a product of intensity of exposure to alkaloids  
91 (via consumption) with passing time as a mitigating factor (via metabolism). Conceptually, this  
92 model functions as a mechanistic effect model (MEM) aimed at understanding the processes  
93 whereby toxic alkaloids kill grazing cattle. MEMs have been recognized for their potential to “close  
94 the gap between laboratory tests on individuals and ecological systems in real landscapes” [20]. We  
95 developed and executed the model in NetLogo 6.01, using the BehaviorSpace tool to implement  
96 simulations [33].

## 97 **Basic principles**

98           Behavior-based encoding of cattle activities was the guiding principle of model design. As  
99 noted by Mclane et al. [7], “the behavior-based approach leads to a more complex web of decisions,  
100 and the responses of the animal to stimuli are often more multifaceted”. We add that the behavior-  
101 based approach is also more likely to allow for instructive emergent properties. In practice, the  
102 behavior-based approach means that at every step of the coding process we sought literature on  
103 actual cattle behavior and then encoded that behavior as realistically as possible. When literature was  
104 lacking we used our knowledge of cattle behavior from our years as livestock managers and  
105 researchers. The behavior-based approach also found expression in model evaluation, when one

106 mode of evaluation was whether the cows in the model “act like cows”. This was achieved through a  
107 lengthy process of visual debugging and other implementation verification [19,34].

108 A second core design principle was parsimony. Because this is the first ABM that we know  
109 of to incorporate cattle at the individual scale of interaction with the environment (1 m<sup>2</sup>) and  
110 extended to a realistic pasture size, we were initially tempted to include every cattle behavior we  
111 could. However, our focus on parsimony to the question at hand meant that we instead included  
112 only those behaviors relevant to the consumption of larkspur. A final guiding principle was that  
113 when a judgement call was needed, we erred on the side of making the effects of alkaloid toxicosis  
114 more prominent. If the model was to show an effect of grazing management on reducing larkspur-  
115 induced toxicosis, we wanted to be sure that we had taken every precaution against preconditioning  
116 it to do so.

117 Overall, we followed as closely as possible the process of “evaluation” laid out by Augusiak  
118 et al. [19], which is aimed at moving beyond insufficient and often counterproductive ideas about  
119 model validation to a more thorough process of generating credible models. Specifically, we  
120 incorporated data evaluation, conceptual model evaluation, implementation verification, output  
121 verification, and other analysis of model output.

## 122 **Entities and state variables**

123 The model has two kinds of entities: pixels representing 1 m<sup>2</sup> patches of land and agents  
124 representing 500 kg adult cows (1.1 animal-units). The patches create a model landscape that is 1663  
125 x 1580 patches (1.66 km x 1.58 km, equal to 262.75 ha, of which 258.82 ha are within the pasture  
126 under study and 3.93 ha are outside the fence line and thus inaccessible). This landscape aims to  
127 replicate pasture 16 at the Colorado State University Research Foundation Maxwell Ranch, a  
128 working cattle ranch in the Laramie Foothills ecoregion of north-central Colorado that is a transition  
129 zone between the Rocky Mountains and the Great Plains. Several pastures on the ranch, including

130 pasture 16, have significant populations of *D. geyeri*, which generate ongoing management challenges  
131 and have fatally poisoned cattle.

132 To make the model appropriately spatially explicit we included three sets of geographic data.  
133 First, using data from the Worldview-2 satellite (8-band multispectral, resolution 2 m) from July 10,  
134 2016, we created an index of non-tree/shrub vegetation distribution within the pasture using a soil-  
135 adjusted vegetation index (SAVI) within ERDAS Imagine 2016 software at a resolution of 1 m  
136 [35,36]. Second, as there are no developed watering locations in pasture 16, with ArcGIS Desktop  
137 10.4 we digitized and rasterized (at 1 m) all locations of naturally occurring water as of July 2017  
138 [37].

139 Lastly, in June and July of 2017 we mapped larkspur distribution and density in pasture 16  
140 using a hybrid approach. We began by digitally dividing the pasture into 272 1-ha sampling plots.  
141 Because we knew larkspur to be of patchy distribution, in each plot we first mapped all larkspur  
142 patches (defined as areas with  $>1$  larkspur plant  $\cdot$  m<sup>2</sup>) using an iPad equipped with Collector for  
143 ArcGIS 10.1 [38] and a Bad Elf Pro+ Bluetooth GPS receiver accurate to 2.5 m. To sample areas  
144 outside of larkspur patches for larkspur density, we counted all living larkspur plants in a 6-m-wide  
145 belt transect running horizontally across the plot, with the origin randomly assigned and any patches  
146 excluded [39]. Using ArcGIS Desktop we then extended the belt-transect-derived larkspur density to  
147 the rest of the plot (excluding patches), and both sets of data were integrated into a 1 m raster of  
148 larkspur distribution.

149 The number of cows (individual agents) in the model varies according to the chosen  
150 stocking density (SD, in AU  $\cdot$  ha<sup>-1</sup>). Cows are assigned the role of “leader” (5%), “follower” (85%),  
151 or “independent” (10%) [16,40,41]. Each cow is also assigned a value for MSAL-tolerance and  
152 larkspur-attraction. MSAL-tolerance determines the MSAL-level at which a cow will “die” and is  
153 randomly assigned to create a normal distribution with 99.9% of values falling within 25% of the

154 mean ( $\bar{x}$ =4,000 mg,  $\sigma$ =333.33 mg) [42]. In this model, death does not result in the removal of a cow  
 155 from the herd; instead, in order to preserve herd and other model functions it is recorded as having  
 156 died, its MSAL-level is set to zero, and it continues to graze. Note that MSAL-tolerance can be  
 157 understood as modeling genetic, physiological, and situational susceptibility.

158 Larkspur-attraction determines how much larkspur the individual cow will consume when in  
 159 a patch with MSAL-content and is also randomly assigned to create a normal distribution with  
 160 99.9% of values falling within 25% of the mean ( $\bar{x}$ =1.0,  $\sigma$ =0.083). A value of 1.0 means that the  
 161 cow will consume larkspur at the same rate as other forage, while values greater or less than 1.0  
 162 cause the animal to, respectively, prefer or avoid larkspur. All functionally relevant state variables for  
 163 patches and cows, as well as global variables and inputs, are described in Table 1.

164 Table 1. Relevant model variables.

| Entity         | Variable            | Description                                                                                                                                                                        |
|----------------|---------------------|------------------------------------------------------------------------------------------------------------------------------------------------------------------------------------|
| <b>Patches</b> | forage-mass         | Amount of currently available forage (g)                                                                                                                                           |
|                | n-forage-mass       | Mean initial available forage in patches within a radius of 3 m (g)                                                                                                                |
|                | MSAL-content        | Amount of toxic alkaloids currently in patch (mg)                                                                                                                                  |
|                | times-grazed        | Number of times patch has been grazed                                                                                                                                              |
| <b>Cows</b>    | role                | Role in the herd: leader, follower, or independent                                                                                                                                 |
|                | MSAL-level          | Current amount of MSAL alkaloids in cow's body (mg); metabolized with a half-life of one grazing-day                                                                               |
|                | MSAL-tolerance      | Level at which cow will be recorded as having died (MSAL-level>MSAL-tolerance); assigned randomly from a normal distribution ( $\bar{x}$ =4,000 mg, $\sigma$ =333.33 mg)           |
|                | larkspur-attraction | Factor determining the relative amount of larkspur a cow will eat when in a patch with MSAL-content; assigned randomly from a normal distribution ( $\bar{x}$ =1, $\sigma$ =0.083) |
|                | herdmates           | Agent-set consisting of nearest 20 cows                                                                                                                                            |
|                | mean-herd-distance  | Mean distance to herdmates                                                                                                                                                         |
|                | total-MSAL-intake   | Total amount of MSAL alkaloids consumed during model run (mg)                                                                                                                      |
|                | daily-MSAL-intake   | Amount of MSAL alkaloids consumed during current day (mg)                                                                                                                          |
|                | hydration           | Hydration level, decreases to zero between visits to water                                                                                                                         |
|                | ready-to-go         | Used by leader cows only, a measure of their inclination to move on from an overgrazed site                                                                                        |
| <b>Globals</b> | waterers            | Patch-set of all watering locations                                                                                                                                                |



|               |                            |                                                                                                                                                                         |
|---------------|----------------------------|-------------------------------------------------------------------------------------------------------------------------------------------------------------------------|
|               | site-tolerance             | Herd-size-dependent variable determining leader cows' tolerance for relatively overgrazed sites                                                                         |
|               | site-radius                | Radius of site when choosing a new site; product of herd-cohesion-factor and herd size resulting in space per cow ranging from 10 m <sup>2</sup> to 1000 m <sup>2</sup> |
|               | herd-distance              | Desired mean-herd-distance; product of herd-cohesion-factor resulting in range from 10 m to 100 m                                                                       |
| <b>Inputs</b> | kgs-per-hectare            | Mean amount of usable forage (kg • ha <sup>-1</sup> )                                                                                                                   |
|               | mean-larkspur-mass         | Mean mass of larkspur plants (g)                                                                                                                                        |
|               | MSAL-concentration         | MSAL alkaloid concentration in larkspur plants (mg • g <sup>-1</sup> )                                                                                                  |
|               | herd-cohesion-factor (HCF) | Determines herd-distance and site-radius; range 1-10, increase leads to more cohesive herd                                                                              |
|               | stocking-density (SD)      | Instantaneous stocking density (AU • ha <sup>-1</sup> )                                                                                                                 |

165

## 166 Scales

167 The model simulates cow activities at multiple temporal and spatial scales. In each tick (one  
168 cycle through the model code), each cow interacts with a single 1 m<sup>2</sup> patch (a feeding station) by  
169 grazing (>99% of the time) or drinking water (twice per day) [13]. A tick does not represent time,  
170 but rather the occurrence of this interaction. This is because the duration of this interaction will vary  
171 depending on the amount of forage available, among other factors. Instead, time is represented by  
172 consumption of forage. When the average consumption of the grazing herd is equal to the average  
173 daily consumption of a 500 kg cow (12.5 kg), the model counts a grazing-day as having passed [43].  
174 Total model run time is measured in animal-unit-months (AUMs) [44].

175 The narrowest scale of spatial interaction is the eating interaction occurring within a single  
176 patch (1 m<sup>2</sup>). When determining the next patch to graze, the cow's decision is based on a desire  
177 either to move closer to its herdmates or to choose a nearby patch with maximum available forage.  
178 This decision happens on the scale of 2-25 m. Finally, leader cows make decisions on the scale of  
179 the entire pasture by deciding when it is time to visit water or time to move from the current feeding  
180 site to a new site.

181 Thus, there are four programmed spatial scales (additional scales may be emergent) at which  
182 the cows interact with the landscape: 1) the individual patch; 2) the scale of herd cohesion, set by the  
183 user; 3) the current feeding site; and 4) other feeding sites, identifiable by leader cows. The number  
184 of ticks that will pass before reaching a stopping point (say, 150 AUMs) depends on the number of  
185 animals grazing, their herd cohesion, the amount and distribution of available forage, and stochastic  
186 emergent properties of the model. For an expanded discussion of temporal and spatial scales of  
187 foraging behavior of large herbivores, see Bailey and Provenza [13].

## 188 Process overview and scheduling

189 Fig 1 illustrates the model execution process for each tick. Each cow moves through each step of  
190 the process, but only performs those steps linked to its role.

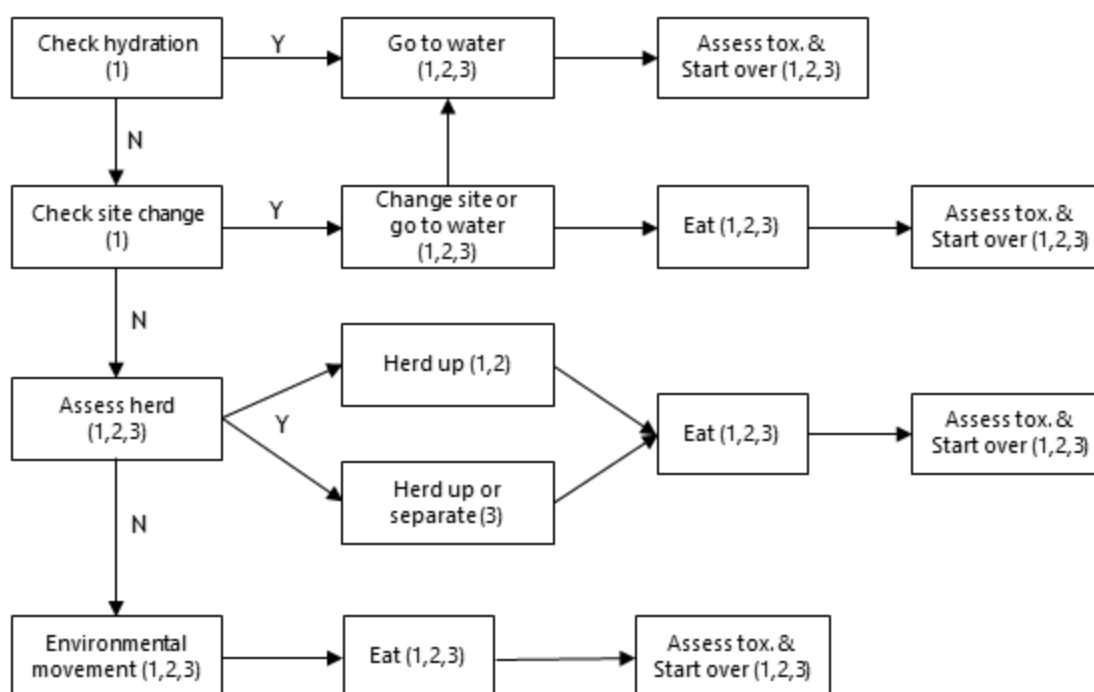

191  
192 Fig 1. Pseudo-coded flow chart of model processes, with role of cows executing each process in parentheses. 1= leader,  
193 2=follower, 3= independent.

## 194 Check hydration

195           Each leader cow checks its hydration level, which is tied to forage consumption such that it  
196 depletes to zero twice per day. We chose two water visits per day based on personal communication  
197 about GPS collar data for the region [D. Augustine, USDA ARS, pers. communication; see 45]. If an  
198 individual leader detects its hydration level as less than or equal to zero, it initiates a movement to  
199 water for the whole herd.

## 200 **Go to water**

201           The water source in pasture 16 is a stream that is intermittently below ground. The go-to-  
202 water procedure directs each cow to go to the nearest waterer patch with two or fewer cows already  
203 present. The hydration value for each cow is then set to maximum, and the value for ready-to-go for  
204 leader cows is set to site-tolerance – 1. This reflects the understanding that cattle will quickly graze  
205 and trample areas around water, rendering them unsuitable for grazing. Instead, they will pick  
206 desirable foraging areas in proximity to but not directly surrounding a watering site, expanding  
207 outward as these areas are grazed [13]. The model thus encourages a site change upon drinking  
208 water, but only if the area surrounding the watering site meets the criteria for increasing ready-to-go  
209 (explained below). A global variable ensures that no other processes occur during a tick when  
210 watering occurs.

## 211 **Check site change**

212           This process is only executed by leader cows, each of which assesses the mean number of  
213 times patches within a radius of 10 m have been grazed. If these patches have been grazed relatively  
214 more (defined as  $>0.5 \cdot \text{mean times-grazed of all patches} + 1.2$ ) than the pasture as a whole, the  
215 value of ready-to-go increases by one. If this value reaches a pre-defined threshold (which increases  
216 with herd size), the individual then initiates a site change, but only if the individual's hydration value  
217 is not approaching zero, in which case it instead initiates the go-to-water procedure. We arrived at  
218 the threshold formula for increasing the value of ready-to-go by using visual debugging and

219 evaluation related to site change frequency, as well as theory on the optimization of grazing effort  
220 [13,46].

221         If conditions for a site change are satisfied, the deciding leader cow first identifies the best  
222 five available sites, using criteria of number of times-grazed, forage-mass, and n-forage-mass to  
223 determine a centroid patch. The nearest of these patches is then used to create a new site at a radius  
224 that is linked to the user selected herd-cohesion-factor and the size of the herd, resulting in 10-1,000  
225  $\text{m}^2 \cdot \text{cow}^{-1}$  in the new site. The leader cow then initiates the change-site procedure for itself and all  
226 other cows.

### 227 **Change site**

228         This procedure is initiated according to role, so that leader cows have first choice of their  
229 location in the new site, followers second, and independents third. Within the allocated new site,  
230 each cow chooses the patch with the most forage that has no cows on it or any of its four direct  
231 neighbors.

### 232 **Assess herd**

233         In combination with the environmental-movement procedure, this process represents >99%  
234 of cow actions in the model. Each cow first sets its herdmates as the nearest 20 other cows [47]. For  
235 leader and follower cows, if the individual's mean distance to these herdmates is greater than herd-  
236 distance, it "herds up". This is achieved by facing the centroid of the herdmates and moving to the  
237 patch with maximum available forage that is 10-25 m in the direction of this centroid, within a cone  
238 of vision of  $\pm 45$  degrees [14]. For independent cows, the same process occurs but is only initiated if  
239 the distance from herdmates is greater than 2.5 times the herd-distance of the other cows.

240 Independent cows are also repelled from the center of their herdmates by moving away by the same  
241 procedure when they are within one-half of the herd-distance.

### 242 **Environmental movement**

243           If none of the above procedures are implemented, each cow will make a movement decision  
244 based on local grazing conditions. If the patches within a radius of 10 m are relatively ungrazed  
245 (mean times-grazed  $< 0.5$ ) the cow will move to the patch with the most available forage within 2 m,  
246 within a  $\pm 45$  degree cone of vision [13]. If the same area is relatively well grazed (mean times-grazed  
247  $\geq 0.5$ ), the cow then looks further afield, choosing the patch with the most available forage within  
248 10 m, within a cone of vision of  $\pm 45$  degrees.

### 249 **Eat**

250           The eat procedure is the core interaction between the cows and the forage, both non-  
251 larkspur and larkspur. Behavior varies slightly depending on how many times the patch has  
252 previously been grazed. If the current visit is the first time it has been grazed, the cow eats 40% of  
253 the available forage [15,18]. If it is the second visit, it eats 50% of what remains. In the third and any  
254 subsequent visits, it eats 60%. Each cow then increases its consumption-level by the same amount  
255 and decreases its hydration value. If there is larkspur present (in the form of MSAL-content), that is  
256 consumed according to the individual cow's larkspur-attraction value, increasing the MSAL-level of  
257 the cow. The corresponding patch values are decreased to account for consumption. Lastly, times-  
258 grazed in the patch is increased by one.

### 259 **Assess toxicosis**

260           This process is triggered at the end of each grazing-day for all cows in order to assess their  
261 toxicosis status, which is measured as their MSAL-level relative to their MSAL-tolerance. Note that  
262 MSAL-level is measured continuously throughout the model run, and has an elimination half-life of  
263 one grazing-day [48]. If MSAL-level exceeds MSAL-tolerance, the count of deaths for the model run  
264 is increased by one, MSAL-level is set to zero, and the cow continues. Numerous other data on  
265 toxicosis status are recorded for all cows at this point. Lastly, the MSAL-level for each cow is  
266 multiplied by 0.5.

## 267 **Design concepts**

### 268 **Emergence**

269           Because the actions of the cows are encoded via simple behavior-based processes, nearly all  
270 model patterns can be considered emergent. These include the stochastic distribution of the herd  
271 and subherds, forage consumption, larkspur consumption, grazing pressure and patterns, and site  
272 changes. Assessment of these un-coded emergent properties and patterns was critical to establishing  
273 the credibility of the model [20].

### 274 **Adaptation, objectives, learning, and predictions**

275           The cows adapt to the grazing environment as they and their fellow cows graze, continually  
276 seeking their main model objective of maximizing forage consumption within behavioral limits [14].  
277 There is no encoded learning or prediction, as the cows are programmed to be familiar with the  
278 location of forage and water in the pasture. However, it may be that learning and prediction are  
279 emergent, in that activities that we might consider to be evidence of those behaviors are visible in  
280 the model as a result of the simple encoded behaviors.

### 281 **Sensing and interaction**

282           The cows sense each other and their environment at multiple spatial scales. Interaction  
283 occurs with other cows whenever moving to a new patch, both via sensing if a patch is already  
284 occupied and by seeking to herd up when too far from their herdmates.

### 285 **Stochasticity**

286           There is no environmental stochasticity in this model iteration, as we sought to make the  
287 landscape as realistic as possible by incorporating relevant data from the real pasture 16. However,  
288 cattle interactions with the forage and larkspur demonstrate moderate stochasticity.

### 289 **Initialization**

290 Landscape initialization begins by loading the SAVI layer and a user-input value for available  
291 forage per ha (kgs-per-hectare). The model uses a nonlinear exponential formula to distribute forage  
292 such that the patches with the least forage contain one-third of the mean forage, while the patches  
293 with the most contain three times the mean forage. Next, the model incorporates the larkspur  
294 distribution layer, using inputs of median larkspur mass (g) and mean MSAL concentration ( $\text{mg} \cdot \text{g}^{-1}$ )  
295 to generate an MSAL alkaloid (hereafter simply “alkaloid”) content for each patch. These values are  
296 based on our unpublished data on *D. geyeri* mass and toxicity at the Maxwell Ranch such that  
297 larkspur plants in areas of high SAVI were 50% larger than the median, and larkspur plants in areas  
298 of low SAVI were 50% smaller than the median. Finally, the model incorporates the water location  
299 layer. All other patch variables are derived from these inputs. Fig 2 shows the initialized landscape.

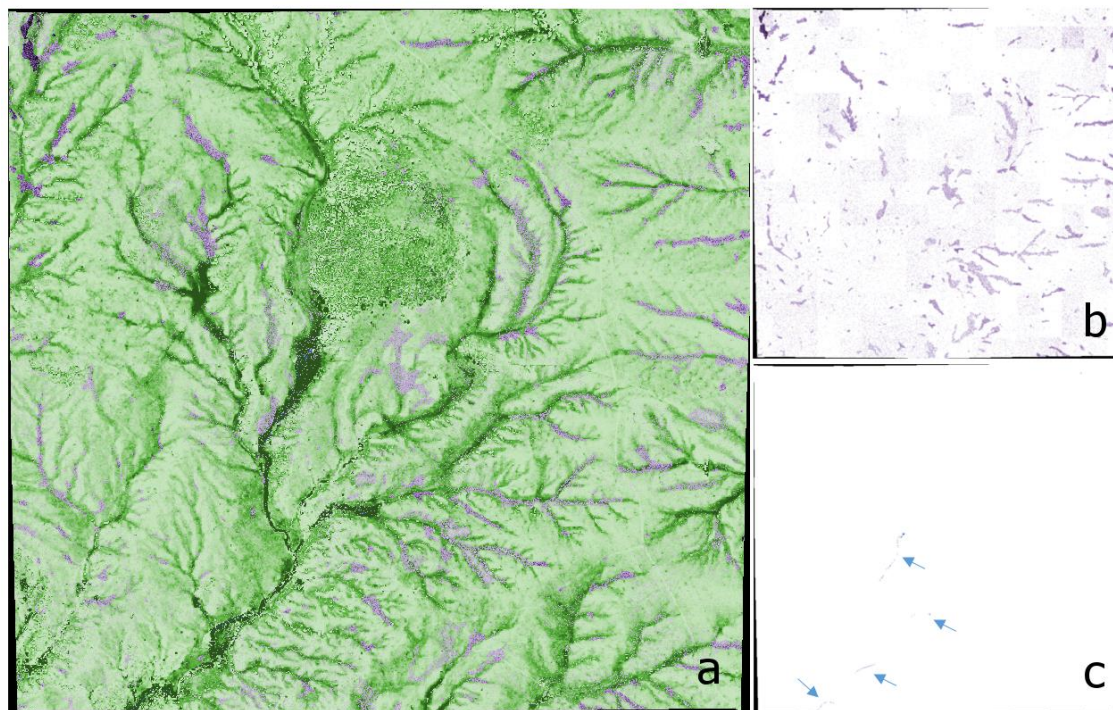

300  
301 Fig 2. Model landscape, 1.66 km x 1.58 km. (a) Initialized full model landscape, with darker green indicating areas with  
302 greater aboveground forage biomass. (b) Landscape with larkspur locations only, with darker purple representing higher  
303 MSAL-content and with results of hybrid sampling method evident. (c) Landscape with watering locations only, pointed  
304 out by arrows.

305 The final step in model initialization is to create the cows by using the input of stocking-  
306 density multiplied by the area of the pasture. All cows are initially in the same random location in the

307 pasture. This location is largely irrelevant as the cows immediately go to water, but we did not want  
308 it to be the same location each time because this would be unrealistic (pasture 16 has multiple  
309 entrances for cattle) and would limit stochasticity. At this point, the model is fully initialized and is  
310 executed following the processes laid out above.

## 311 **Simulation**

312 We used the BehaviorSpace tool in NetLogo to run a full factorial simulation of four  
313 different levels of both herd-cohesion-factor (1, 4, 7, and 10) and stocking-density (0.25, 0.5, 1.0,  
314 and 2.0 AU • ha<sup>-1</sup>). We replicated each combination 30 times, for a total of 480 simulations. Input  
315 median larkspur mass was 3.5 g and input MSAL alkaloid concentration was 3.0 mg • g<sup>-1</sup>. We chose  
316 these values to be representative of an excellent growing year with larkspur plants at bud stage, when  
317 the alkaloid pool (total available mg) is highest—arguably the most dangerous possible conditions.  
318 This is also a time of year that cattle grazing in larkspur habitat is frequently avoided, despite being a  
319 highly desirable time for grazing [1,4,49]. Input value for kgs-per-hectare was 500 kg, based on  
320 current ranch usage and typical values for the area.

## 321 **Observation**

322 Of primary importance were data related to alkaloid consumption, assessed according to  
323 dose-response data from previous research [42]. Most interesting was the number of times in a  
324 model run that any individual cow crossed the threshold into potentially lethal acute toxicosis,  
325 during which they would be expected to be recumbent and unable to stand, with a high likelihood of  
326 death [42]. To measure the number of such cases, the model counted cows whose MSAL-level  
327 exceeded their MSAL-tolerance at the end of a grazing-day.

328 The model also recorded data underlying the trends found for lethal acute toxicosis, most  
329 importantly data on daily, total, and maximum alkaloid intake. These data assisted in identifying  
330 potential mechanisms for the role of herd cohesion and stocking density in influencing deaths.



331 Additional data, such as forage consumption, number of site changes, travel distance per day, and  
332 evenness of grazing impact, provide additional insight and model output verification.

### 333 **Statistical analysis**

334 We used both JMP Pro 13.0.0 and R statistical software, version 3.3.3 for data analysis and  
335 presentation [50,51]. Data for daily alkaloid intake, which amounted to 1.88 million data points, were  
336 organized and cleaned using OpenRefine 2.8 [52]. We began by assessing the role and relative  
337 influence of HCF and SD in generating lethal acute toxicosis, within two contexts: first, using their  
338 16 combinations as “management levels” to explore overall trends in a management-relevant  
339 manner; and, second, using HCF and SD as continuous variables within a regression framework to  
340 provide more information on the relative influence of each. To regress the lethal acute toxicosis  
341 count data we used a generalized linear model (GLM) with a negative binomial distribution and a  
342 log-link function using the MASS package in R [53,54]. To confirm that the negative binomial  
343 distribution was the correct choice, we compared it to a GLM with a Poisson distribution and a log-  
344 link function. The GLM with the negative binomial distribution was superior, using residual  
345 deviance and Akaike’s information criterion (AIC) as judgment criteria [55].

346 To identify mechanisms for how HCF and SD were influencing deaths, we used the same  
347 negative binomial GLM approach to analyze the relationship between various intake data and lethal  
348 acute toxicosis. We did so by first hypothesizing which factors were driving deaths, and then looked  
349 at single-factor models for each, assessed using AIC values and model coefficients [55]. Because the  
350 goal was to identify key mechanisms rather than determine the best predictive model, this provided  
351 more insight than examining a global model or various permutations of factors.

352 Finally, we analyzed the relationship of HFC and SD to the identified mechanisms using  
353 multiple linear regression (R base package). While there were some indications of heteroscedasticity  
354 and outliers, we determined that linear regression was robust to those errors in these cases. We

355 confirmed this by also fitting alternate models within other regression frameworks (robust and non-  
356 parametric), which returned very similar results. Interaction effects are shown when significant;  
357 otherwise, they were excluded from the models.

## 358 **Results**

### 359 **Model output verification**

360 A core element in the evaluation of behavior-based mechanistic effect models is a  
361 comparison between multiple emergent model patterns and observed patterns in the real system  
362 [20]. In this case, this helped to establish that the modeled cows, coded for individual behaviors,  
363 acted like real cows when interacting with one another and the landscape, at least in regard to  
364 behaviors relevant to larkspur consumption. Toward this end, first we offer Fig 3 to illustrate how  
365 varying HCF influences herding patterns, and to show how grazing was distributed across the  
366 pasture in one model run.

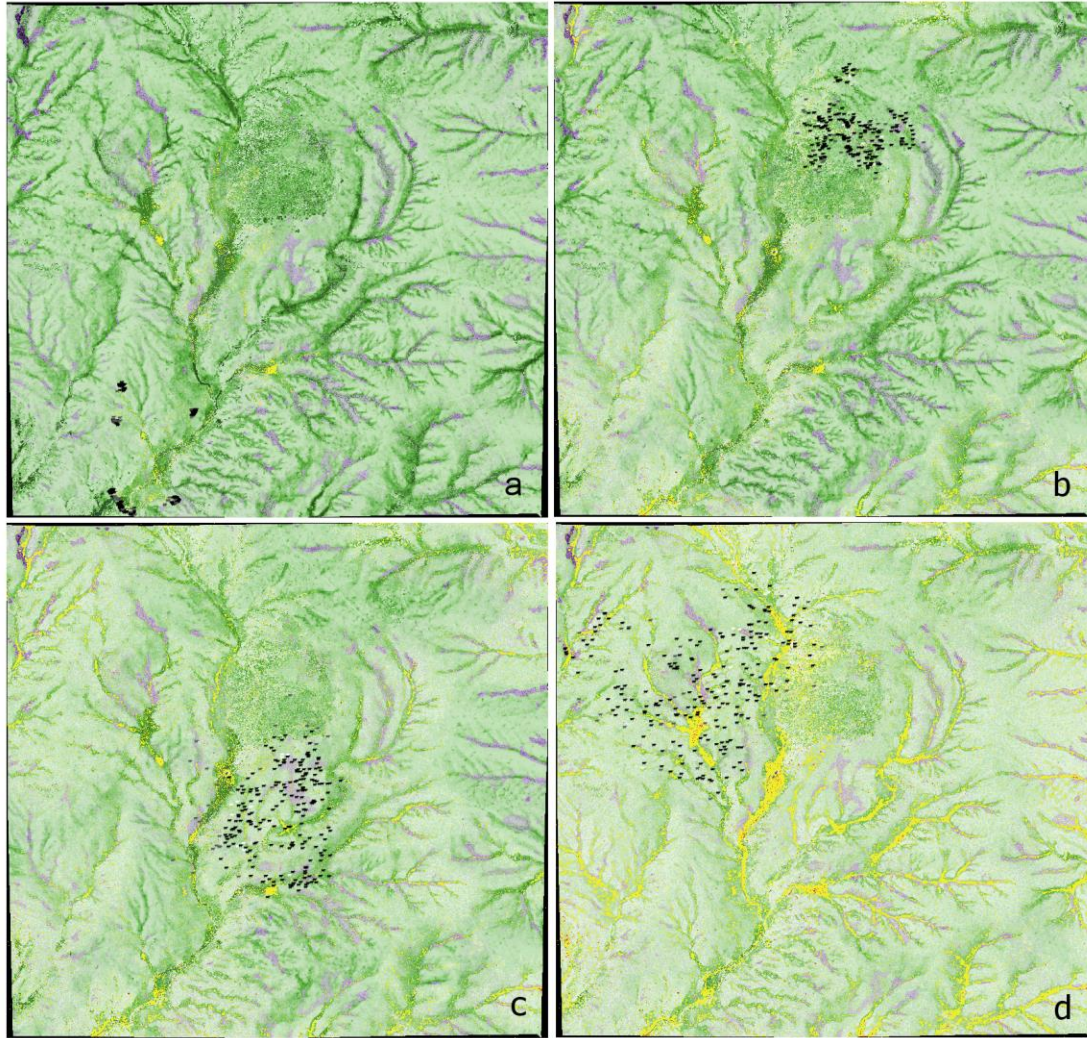

367

368 Fig 3. The effect of varying herd-cohesion-factor (HCF) on herd patterns, displayed at different levels of pasture usage  
369 (AUMs). Note that the cows depicted in these images are drawn 200 times larger than they really are to aid visualization,  
370 which makes them appear closer to one another than they are. Pasture size is 1.66 km x 1.58 km, and stocking density  
371 for all images is 1.0 AU • ha<sup>-1</sup>. White cows are leaders, black followers, and gray independents. Yellow indicates patches  
372 that have been grazed twice, red three times. (a) HCF=10, AUMs=14; (b) HCF=7, AUMs=68; (c) HCF=4, AUMs=119;  
373 (d) HCF=1, AUMs=163. Typical usage for this pasture (258.82 ha) is 150 AUMs.

374

375

376

377

378

379

Decreasing HCF increases overall herd separation and leads to more wandering among the independent cows and others. Note that in Fig 3a the cows have formed distinct subherds. This appears to be an emergent property of cows grazing with high herd cohesion (herd-distance  $\leq 20$  m).

The cows initially graze the areas with high forage amounts (dark green) in relative proximity to the water, and gradually extend their impact outward, targeting high productivity areas. By the end

380 of the grazing cycle (Fig 3d), they have visited the entire pasture, though areas furthest from water  
381 have been grazed less [56]. Areas of initial high forage mass have been grazed two or more times,  
382 while many areas of low forage mass have not been grazed at all. These results are in line with well-  
383 established qualitative understanding of grazing patterns in large pastures [13,44].

384 The variation in forage consumption among individuals also aligned well with the variation  
385 seen in real cows foraging native pasture. While a grazing-day for the whole herd was defined as  
386 mean consumption of 2.5% of body weight (12.5 kg), the mean 99.9% daily range of consumption  
387 for all model runs was 2.34-2.66% of body weight. This range of consumption aligns well with  
388 common “rules of thumb” and predictive formulae [43,57,58].

389 The mean value for site changes per day for the 16 management levels varies from 2.3 for  
390 few cows grazing very loosely (HCF=1, SD=0.25) to 6.0 for many cows grazing very cohesively  
391 (HCF=10, SD=2.0). These values are in line with the estimate of 1-4 hours per feeding site by Bailey  
392 and Provenza [13]. For runs with few cows grazing with little cohesion (HCF=1, SD=0.25), mean  
393 daily travel was 4.16 km, while many cows grazing very cohesively (HCF=10, SD=2.0) traveled an  
394 average of 7.40 km per day. These numbers and the positive trend also track well with data from  
395 previous studies [59].

396 As a last point of output verification, we were interested to see if the number of modeled  
397 cases of larkspur-induced lethal acute toxicosis would parallel numbers from the literature when we  
398 modeled grazing to be similar to the current management scheme. When modeled to reflect current  
399 management practices, with HCF=4, SD=0.5, and for 150 AUMs (removing approximately 45% of  
400 available forage), we recorded a mean of 2.8 cases of lethal acute toxicosis across 30 model  
401 iterations. This amounts to 2.4% of cows, which falls within the estimate of 2-5% in pastures with  
402 dangerous amounts of larkspur [4]. Additionally, individual model runs of zero deaths occurred in all

403 but four of the management levels, which aligns with our anecdotal understanding of producer  
404 experience.

### 405 **Lethal acute toxicosis**

406 On its own, increased herd cohesion demonstrated the potential to significantly reduce  
407 deaths. For example, at a stocking density of  $0.5 \text{ AU} \cdot \text{ha}^{-1}$ , mean deaths declined from 4.33 at  
408  $\text{HCF}=1$  to 1.37 at  $\text{HCF}=10$ . Similarly, increased stocking density in the absence of changes in herd  
409 cohesion also greatly reduced deaths, for example from a mean of 7.5 at  $\text{SD}=0.25$  to 0.70 at  $\text{SD}=2$   
410 at a constant HCF of 4. Working together, increases in both herd cohesion and stocking density  
411 from the minimum to the maximum achieved a 99.6% reduction in deaths (Fig 4). The mean value  
412 for MSAL-tolerance among dead cows was 3,725.8 mg, while the mean value for larkspur-attraction  
413 was a factor of 1.06. Of 1,132 total deaths in the simulation, 3.9% were among cows with the role of  
414 leader, 78.7% were among followers, and 17.4% were among independents.

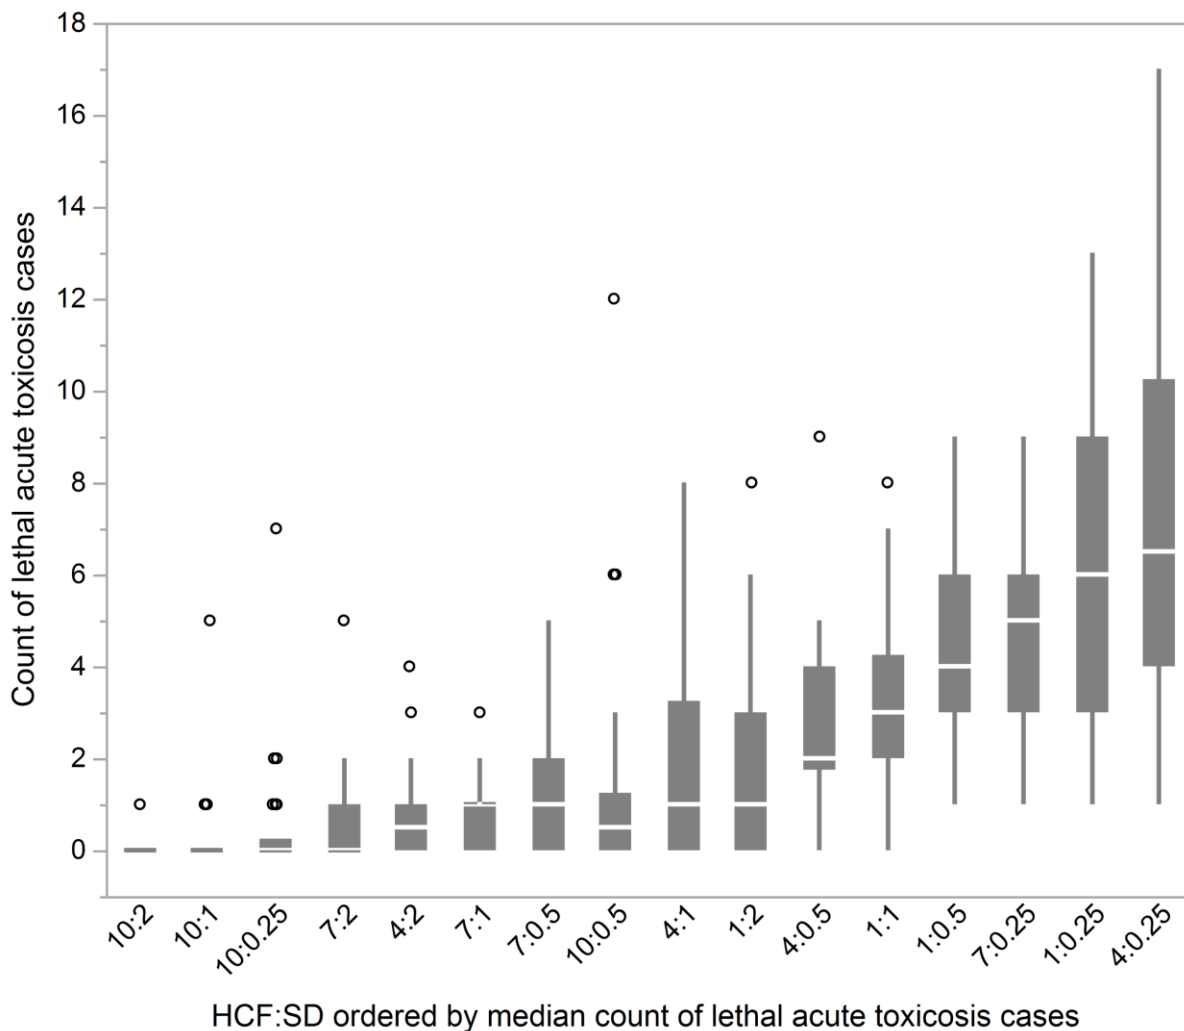

415 Fig 4. Box plots of distribution of counts of lethal acute toxicosis cases (MSAL-level  $\geq$  MSAL-tolerance at end of  
416 grazing-day). From 30 model runs for each combination of herd-cohesion factor (HCF) and stocking-density (SD),  
417 ordered by median count of lethal acute toxicosis cases, with outliers as jittered circles.  
418  
419

420 The coefficient for HCF (Table 2), as a log odds ratio, indicates that an increase of one in  
421 HCF resulted in a 13.5% decrease in occurrences of lethal acute toxicosis. The coefficient for SD  
422 indicates that an increase of one in SD resulted in a 54.8% decrease. Lastly, the coefficient for the  
423 interaction of HCF with SD indicates that an increase in either HCF or SD slightly increases the  
424 effect of the other. The GLM  $\beta$  coefficients indicate that HCF had 91.8% of the influence of SD in  
425 reducing deaths.  
426

427 Table 2. Results of GLM with negative binomial distribution and log-link function for count of lethal acute toxicosis as  
 428 predicted by herd-cohesion-factor (HCF) and stocking-density (SD).  $\beta$  coefficients are from the same GLM without the  
 429 interaction present. GLM fit: Fisher scoring iterations=1; residual deviance=516.94 on 476 degrees of freedom;  
 430 AIC=1686.3.

| Coefficient | Estimate | Std. error | p-value | $\beta$ |
|-------------|----------|------------|---------|---------|
| Intercept   | 2.341    | 0.128      | <0.001  |         |
| HCF         | -0.145   | 0.024      | <0.001  | -0.225  |
| SD          | -0.793   | 0.136      | <0.001  | -0.245  |
| HCF:SD      | -0.079   | 0.029      | 0.007   |         |

431

## 432 Identifying mechanisms

433 We hypothesized that five factors might explain how HCF and SD were reducing deaths:  
 434 mean individual daily alkaloid intake (the average single-day alkaloid intake in a model run), standard  
 435 deviation of individual daily alkaloid intake, mean maximum individual daily alkaloid intake (each  
 436 cow's worst day), standard deviation of maximum individual daily alkaloid intake, and the coefficient  
 437 of variation for individual total alkaloid intake. Results for the comparison of single-factor models  
 438 reveal varying influence on lethal acute toxicosis among these factors (Table 3).

439 Table 3. Results for comparison of single-factor negative binomial generalized linear models with a log-link function  
 440 using corrected Aikake's information criterion. All values for quartiles are in mg, except for CV total, which is unitless.  
 441 Percent  $\Delta$  deaths from  $Q_1$  to  $Q_3$  is observed percent change in lethal acute toxicosis count between quartile one and  
 442 three.

| Mechanism        | GLM    |             |            | Pct. $\Delta$ deaths<br>from $Q_1$ to $Q_3$ |         |
|------------------|--------|-------------|------------|---------------------------------------------|---------|
|                  | AICc   | coefficient | Quartile 1 |                                             |         |
| $\sigma$ Maximum | 1473.3 | 0.0072      | 410.3      | 591.2                                       | 130.70% |
| $\sigma$ Daily   | 1510.1 | 0.0265      | 363.8      | 435.4                                       | 192.36% |
| Mean maximum     | 1671.2 | 0.0019      | 1275.0     | 1987.7                                      | 135.55% |
| Mean daily       | 1911.4 | -0.0374     | 527.9      | 543.0                                       | -55.58% |
| CV total         | 1930.2 | -7.044      | 0.118      | 0.185                                       | -6.69%  |

443

444 Because they had the most significant effect on lethal acute toxicosis, and were scored lowest for  
 445 AICc, we focused the rest of the analysis on examining the relationship of HCF and SD to standard  
 446 deviation of maximum individual daily alkaloid consumption, standard deviation of individual daily  
 447 alkaloid consumption, and mean maximum individual daily alkaloid consumption. A model for lethal  
 448 acute toxicosis count that contained these three mechanisms had an AICc score of 1368.3.

## 449 **Daily alkaloid intake**

450 Mean individual daily alkaloid intake represents the mean of every single-day alkaloid intake  
451 for every cow, and ranged from a low of 525.1 mg (HCF=4, SD=0.25) to a high of 550.9 mg  
452 (HCF=10, SD=0.25). Multiple linear regression results indicate that HCF and SD had limited  
453 influence on mean daily intake (adj.  $R^2 < 0.19$ ), with both associated with slight increases. On the  
454 other hand, the standard deviation of daily alkaloid intake, which quantifies the spread of the  
455 distribution of daily alkaloid intake values, differed significantly between management levels, from a  
456 high mean of 460.5 mg (HCF=1, SD=0.25) to a low mean of 301.3 mg (HCF=10, SD=2). Multiple  
457 linear regression results indicate that HCF and SD were strongly influential, with HCF exerting  
458 93.0% more influence than SD (Table 4).

459 Table 4. Results of multiple linear regression for the standard deviation of individual daily alkaloid intake as predicted by  
460 herd-cohesion-factor (HCF) and stocking-density (SD). Adj.  $R^2 = 0.76$ .

| <b>Coefficient</b> | <b>Estimate</b> | <b>Std. error</b> | <b>p-value</b> | <b><math>\beta</math></b> |
|--------------------|-----------------|-------------------|----------------|---------------------------|
| Intercept          | 487.79          | 2.61              | <0.001         |                           |
| HCF                | -11.33          | 0.33              | <0.001         | -0.774                    |
| SD                 | -29.38          | 1.64              | <0.001         | -0.401                    |

461

462 A box plot showing the distribution of all individual daily alkaloid intake values ( $n = 1.88 \cdot 10^5$ ) at  
463 each management level further illustrates these patterns (Fig 5).



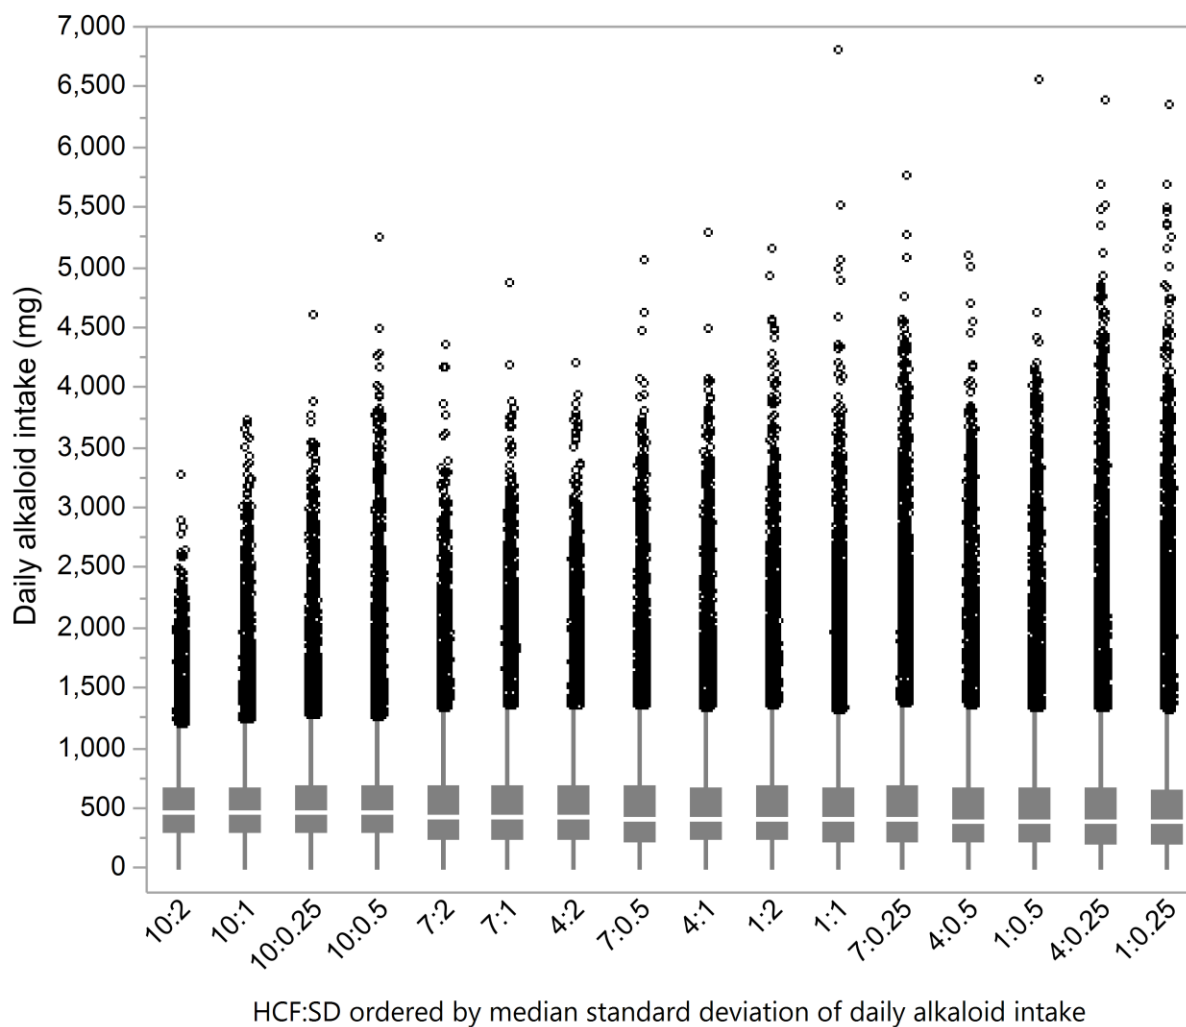

464 HCF:SD ordered by median standard deviation of daily alkaloid intake  
465 Fig 5. Box plots of distribution of individual daily alkaloid intake (mg;  $n=1.88 \cdot 10^5$ ). From 30 model runs for each  
466 combination of herd-cohesion factor (HCF) and stocking-density (SD), ordered by median standard deviation of daily  
467 alkaloid intake, with outliers as jittered circles.  
468

## 469 Maximum daily alkaloid intake

470 Mean maximum individual daily alkaloid intake quantifies the mean worst day for all cows  
471 during a model run, and ranged from 1,045.6 mg (HCF=10, SD=2) to 2,450.2 mg (HCF=1,  
472 SD=0.25). The standard deviation of maximum individual daily alkaloid intake quantifies how widely  
473 dispersed this value was among the herd members, and ranged from 303.0 mg (HCF=10, SD=2) to  
474 704.0 mg (HCF=4, SD=0.25). Regression results for both factors provide further insight into the  
475 relationship of HCF and SD to lethal acute toxicosis (Tables 5-6).

476 Table 5. Results of multiple linear regression for the mean of maximum individual daily alkaloid intake as predicted by  
477 herd-cohesion-factor (HCF) and stocking-density (SD). Adj.  $R^2=0.82$ .  $\beta$  coefficients are from the same model without  
478 the interaction present.

| <b>Coefficient</b> | <b>Estimate</b> | <b>Std. error</b> | <b>p-value</b> | <b><math>\beta</math></b> |
|--------------------|-----------------|-------------------|----------------|---------------------------|
| Intercept          | 2547.56         | 28.58             | <0.001         |                           |
| HCF                | -61.86          | 4.44              | <0.001         | -0.31                     |
| SD                 | -686.15         | 24.80             | <0.001         | -0.84                     |
| HCF:SD             | 22.75           | 3.85              | <0.001         |                           |

479

480 Table 6. Results of multiple linear regression for the standard deviation of maximum individual daily alkaloid intake as  
481 predicted by herd-cohesion-factor (HCF) and stocking-density (SD). Adj.  $R^2=0.47$ . No significant interaction was  
482 present.

| <b>Coefficient</b> | <b>Estimate</b> | <b>Std. error</b> | <b>p-value</b> | <b><math>\beta</math></b> |
|--------------------|-----------------|-------------------|----------------|---------------------------|
| Intercept          | 718.57          | 11.33             | <0.001         |                           |
| HCF                | -22.34          | 1.42              | <0.001         | -0.52                     |
| SD                 | -96.06          | 7.12              | <0.001         | -0.45                     |

483

## 484 **Distinct persistent subherds**

485 Model outputs (Fig 6) suggested an apparent scalar behavioral discontinuity between  
486 HCF=7 and HCF=10, which we believe results from the emergent property of distinct persistent  
487 subherds.

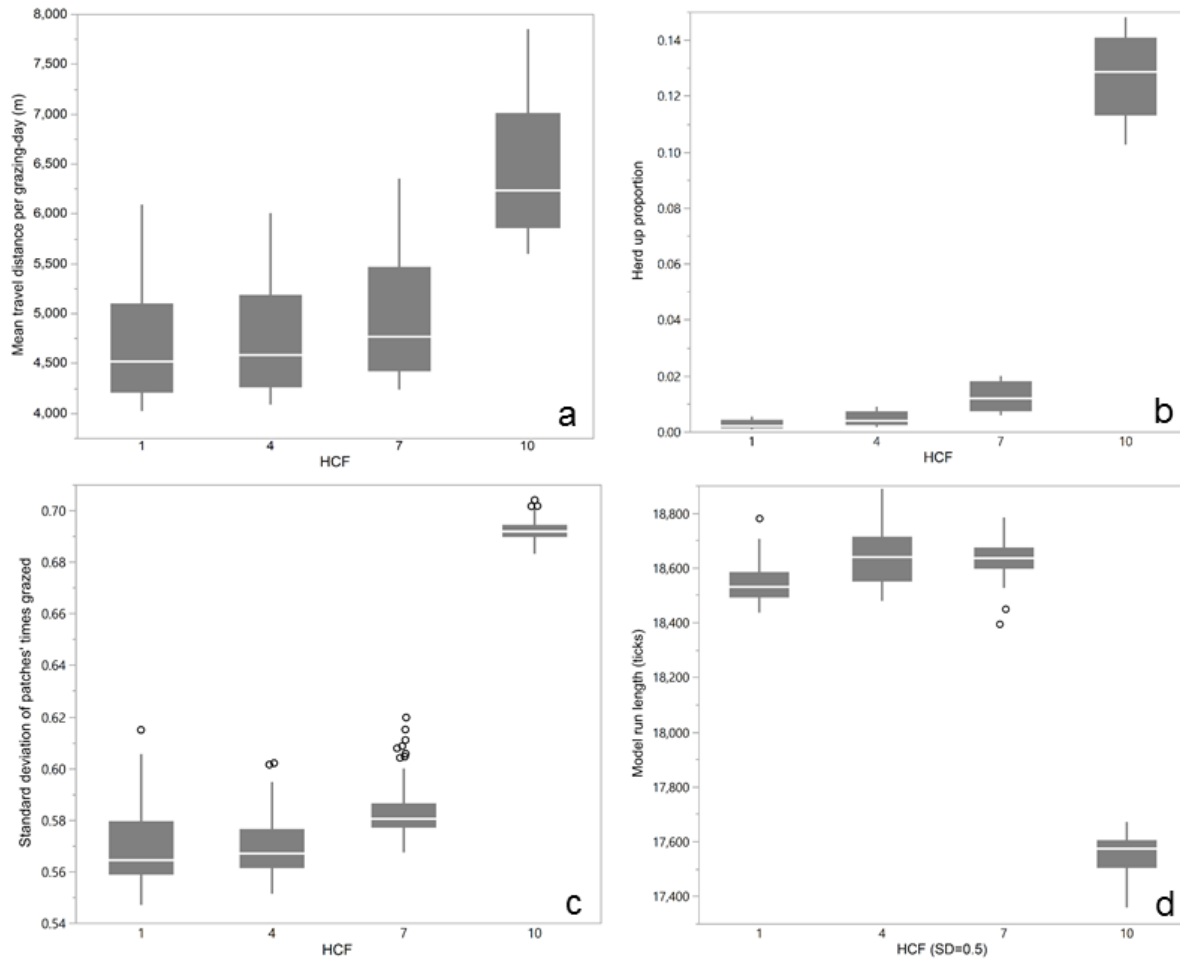

488  
489 Fig 6. Box plots of various model evaluation data demonstrating effect of distinct persistent subherds. (a) Mean  
490 individual travel distance per grazing day (m) by herd cohesion factor (HCF); (b) Proportion of use of assess herd  
491 procedure (versus environmental movement) to choose a new grazing patch, a measure of herd-based versus individual  
492 optimization, by HCF; (c) Standard deviation of times-grazed count for all patches at end of model run, a measure of  
493 grazing heterogeneity, by HCF; (d) Total model run length, an inverse indicator of grazing efficiency, by HCF at  
494 stocking density=0.5.  
495

## 496 Discussion

497 Research into best practices for grazing management in larkspur habitat has long focused on  
498 either attempts to eliminate larkspur or on phenological avoidance (what we term “fight or flight”).  
499 Because elimination through herbicides or mowing is costly and often impractical [60], most  
500 research and current recommendations focus on avoiding grazing in larkspur habitat at times of year  
501 when it is considered most dangerous to cattle, exemplified by the toxic window concept [3,4,23].

502 While this approach has certainly helped many producers better understand larkspur toxicity  
503 dynamics, there is no evidence that it has reduced the overall number of deaths. There are many  
504 reasons for this, and interactions are complex and place-based, but we suggest that a reliance on a  
505 static view of palatability is largely to blame.

506 An alternative to fight or flight is to manage grazing such that larkspur intake remains below  
507 the threshold where there is an observable negative effect on the cattle. This study provides an  
508 indication that this may be possible even in pastures with dangerous amounts of Geyer's larkspur.  
509 For the first time, this model suggests that herd cohesion and stocking density are key drivers of  
510 larkspur-induced toxicosis, and that management decisions that influence these factors hold  
511 potential to limit deaths. Of crucial importance is the observation that herd cohesion, which has  
512 received almost no consideration in the broader grazing management literature, is an important  
513 determinant of risk of death from larkspur.

514 An essential point for understanding how increased herd cohesion and stocking density  
515 reduced deaths is that Geyer's larkspur grows most densely in relatively productive areas, which are  
516 thus desirable areas for foraging. Functionally, increased herd cohesion and stocking density lead to  
517 increased competition for forage, making it more difficult for any individual to monopolize a  
518 resource- and larkspur-rich area. Additionally, increased herd cohesion leads to less wandering  
519 among individuals, making it less likely an individual cow will wander into a dense larkspur patch  
520 alone. Evidence for the danger of wandering behavior is found in the disproportionate death rate of  
521 cows with the role of independent. Lastly, increased stocking density does appear to lead to dilution,  
522 but in the form of lowered maximum individual daily intake rather than lowered mean individual  
523 daily intake.

524 Mechanistically, decreased risk of lethal acute toxicosis occurred through: 1) a narrowed  
525 distribution of individual daily alkaloid intake, 2) lowered mean and narrowed distribution of outlier

526 alkaloid intake days. Herd cohesion played a stronger role in narrowing the distribution of daily  
527 intake, stocking density was more influential in lowering the mean of outlier intake, and both played  
528 a relatively equal role in narrowing the distribution of outlier intake events. Strong evidence for the  
529 role of these as mechanisms is provided by the much lower AICc score for the model with the  
530 mechanisms than for the model with HCF and SD (1386.3 vs. 1686.3). This suggests that other  
531 management interventions that succeed in influencing these mechanisms would have similar success  
532 in reducing deaths.

533         When we recognize that even in the worst-case scenario lethal acute toxicosis is a rare event  
534 among thousands of grazing-days, it becomes clear why narrowing the distribution of individual  
535 intake and reducing outliers is so important. With a mean MSAL-tolerance of 4,000 mg, an average  
536 bad day in a herd with low herd cohesion and low stocking density would put an individual  
537 (especially one with lower tolerance or higher attraction to larkspur) in danger. Meanwhile,  
538 individuals grazing in a herd with high herd cohesion and at a high stocking density in the same  
539 pasture, even those with low tolerance, would need at least a few upper-end intake days in a row to  
540 risk death—an unlikely occurrence.

541         Note that we selected the bounds of herd cohesion and stocking density to align with what  
542 we believe to be realistically achievable by managers in the western US. While stocking density is  
543 easily understood, it may be worthwhile to describe how we think the various levels of herd-  
544 cohesion-factor (HCF) could be achieved (reference Fig 3). We think of HCF values of 1 and 4 as  
545 representative of most current extensive management, such that there is a small to moderate amount  
546 of herding behavior but in which animals are often spread out across a large area. The difference  
547 between these two might be accounted for by differences in breeding history, carnivore pressure, or  
548 genetic drift. To achieve an HCF of 7, we think cattle would need to be selected for strong herding  
549 instinct or be regularly, but not necessarily continually, herded. An HCF of 10 is comparable to

550 many herds of wild ungulates and is achievable through the continual presence of a herder or a  
551 sustained effort at selecting for herding behavior.

552         There are two additional ways that a rapid increase in herd cohesion may be achieved. First,  
553 a drastic increase in stocking density (via increased animal-units or subdivided pastures) to a level  
554 that approaches “mob” grazing can forcibly increase cohesion. Second, the emerging technology of  
555 virtual fencing holds tremendous promise for achieving rapid changes in grazing behavior, including  
556 herd cohesion [61].

557         An unexpected emergent phenomenon occurred at HCF=1, in the form of distinct  
558 persistent subherds (see Fig 3a). These subherds are small groups of >20 but usually <35 cows that  
559 stick closely together for an entire inter-watering period, with some exchange of individuals or  
560 combining when two groups meet. This does not occur at higher levels of HCF. Cows in distinct  
561 persistent subherds traveled significantly greater distances, spent more time seeking to be closer to  
562 herdmates rather than maximizing forage intake, and grazed more heterogeneously (Figs 6a-c).  
563 Nevertheless, these cows reached 150 AUMs of forage consumption in 94.3% of the model run  
564 time of cows at lower herd cohesion levels, suggesting higher grazing efficiency (Fig 6d). We believe  
565 that these data are evidence of a scale-dependent behavioral discontinuity that may hold relevance to  
566 other grazing management challenges [62].

## 567 **Model parsimony and study limitations**

568         Perhaps the most obvious omissions from the model are those behaviors that we determined  
569 to hold little to no relevance to larkspur consumption, at least in this pasture. These include  
570 response to slope, resting, and some inconsistently understood aspects of dominance behaviors.  
571 While there is nothing preventing them from being included, we decided that in this case these  
572 behaviors would introduce uncertainty while adding little realism to cattle-larkspur dynamics. The  
573 model also excludes plant regrowth. For Geyer’s larkspur, this is not an issue, as plants that are

574 clipped or grazed during the bud stage exhibit very little regrowth [K. Jablonski, pers. obs.]. For  
575 other forage, we determined that regrowth in July in this semi-arid climate would not be substantial  
576 enough within a single grazing period to warrant inclusion.

577         The occurrence and measurement of death in the model might strike some as unrealistic.  
578 However, given that deaths in a herd would change herd behavior in unknown ways, and that the  
579 owner of the cattle would likely intervene once one death-event had occurred, we believe that  
580 counting the death and resetting the cow's MSAL-level is the most accurate way to assess risk at  
581 different management levels.

582         Another potential limitation concerns the model used for alkaloid metabolism. While there  
583 has been some effort at the generation of such a model [e.g., 48], these efforts have been limited to  
584 highly controlled settings using hay and other stored feeds and periodic dosing with alkaloids.  
585 Additionally, little to nothing is known about the role of other forage in exacerbating or mitigating  
586 the effects of larkspur consumption. As such, we had no confidence that a continuous metabolic  
587 model would be more useful than the simple daily half-life model that we used.

588         Despite these limitations, we are confident that we have realistically modeled cattle-larkspur  
589 dynamics, that increased herd cohesion and stocking density lower the risk of lethal acute toxicosis,  
590 and that variations in mean and maximum daily alkaloid intake are the predominant mechanism for  
591 this reduction. However, the exact values for when risk approaches zero may be dependent on the  
592 circumstances of this model iteration—that of *D. geyeri*, at the input values for mass and toxicity, on  
593 a ranch in northern Colorado.

594         It is worth noting that dangerous levels of *D. geyeri* are typically found on a limited number  
595 of a single operation's grazing units. This means that the inclusion of herding to increase herd  
596 cohesion, for example, would usually only be necessary for a relatively brief period. In addition, it  
597 means that any potential secondary effects of sub-lethal larkspur consumption, such as appetite

598 suppression or lethargy (whether and how these would occur is unclear), would be of similarly  
599 limited duration. Nevertheless, in pastures with a dangerous amount of larkspur, negative sub-lethal  
600 effects may be unavoidable even (or especially) when death is avoided.

601 As with any research where cattle lives and producer livelihoods are at stake, it is most  
602 important to emphasize that producers should exercise caution when incorporating our findings into  
603 their own management, including careful assessment of other potential effects of increased herd  
604 cohesion or stocking density. Those with low amounts of Geyer's larkspur or with no history of  
605 losses might find comfort in altering their grazing management to incorporate this study's findings.  
606 Those with a great deal of larkspur (Geyer's or other species) or a history of losses should be more  
607 careful.

## 608 **Other model implications and future directions**

609 There is a broad literature on the effect of stocking rate/stocking density on many outcomes  
610 (though not larkspur-induced toxicosis) but very little on the effects of herd cohesion, nor on the  
611 interaction of these factors [44]. This is likely due to the relative ease of varying cattle numbers  
612 versus manipulating cattle behavior. Because this study provides evidence that it is not only the  
613 number of animals but also how they behave that affect the likelihood of death by larkspur, we are  
614 excited to explore the role of herd cohesion, particularly the emergent property of distinct persistent  
615 subherds, in other aspects of grazing ecology. If herd cohesion is genetically encoded, matrilineally-  
616 oriented, or management-determined (or a combination thereof), what role might it play in other  
617 negative outcomes, such as overgrazing of riparian areas or exposure to predation by carnivores [63],  
618 and how might we influence it in different scenarios? The evolving promise of affordable GPS tags  
619 means that we may also start to be able to test this through direct observation of entire herds [64].

620 For cattle-larkspur dynamics, our next step is to place these modeling results in context with  
621 ongoing plant experiments and producer surveys to better formulate management recommendations



622 that work. Additionally, we would like to improve our understanding of alkaloid metabolism and  
623 tolerance, as well as the role of preference in larkspur intake. For alkaloid metabolism and tolerance,  
624 this means building upon previous studies [e.g., 21], which have been undertaken in highly  
625 controlled settings using periodic high dosing, to model the stochastic dosing in a dynamic  
626 environment that occurs in reality. For larkspur preference, this means moving beyond the entirely  
627 anecdotal evidence of bouts of larkspur consumption [e.g., 65] to a more sophisticated  
628 understanding of the role of preference, diet mixing, and satiation in larkspur-induced toxicosis  
629 [66,67].

630 A final next step for the model presented here is what Augusiak et al. [19] term model  
631 output corroboration, wherein model outputs are compared to new, independent data and patterns.  
632 As noted above, this is very difficult when cattle lives are at risk. However, the results presented here  
633 have encourage us to start to think about how such corroborative data could be collected. This will  
634 likely entail a combination of full-herd GPS with careful on-the-ground monitoring by a herder.

635 Though ABMs have some limitations, we believe they offer an exciting new tool for  
636 understanding the grazing behavior of livestock. Indeed, the synergistic emergence of financially  
637 viable GPS technology [64] and “virtual fencing” [61], along with the increasing power of desktop  
638 computers, suggests that the time is right for a computational revolution in livestock grazing  
639 management. We are excited that this study provides a first example of the potential of agent-based  
640 models to contribute to this revolution.

## 641 **Acknowledgements**

642 We thank Joel Vaad, manager of the Maxwell Ranch, for access, assistance, and advice. Early  
643 conversations with Michael A. Smith and the Sims family of McFadden, WY, provided crucial  
644 insight into the relationship between grazing management and larkspur. Tanner Marshall assisted in  
645 data collection and asked difficult questions that moved the work forward. We are grateful to

646 DigitalGlobe for a generous imagery grant that greatly improved our ability to assess the grazing  
647 landscape, and to Hexagon Geospatial for providing the software to analyze the imagery.

## 648 **References**

- 649 1. Green B, Gardner D, Pfister J, Cook D. Larkspur poison weed: 100 years of delphinium  
650 research. *Rangelands*. 2009;31: 22–27. doi:10.2111/1551-501X-31.1.22
- 651 2. Pfister JA, Gardner DR, Panter KE, Manners GD, Ralphs MH, Stegelmeier BL, et al. Larkspur  
652 (*Delphinium* spp.) poisoning in livestock. *J Nat Toxins*. 1999;8: 81–94.
- 653 3. Welch KD, Cook D, Green BT, Gardner DR, Pfister JA, McDanel TG, et al. Adverse effects  
654 of larkspur (*Delphinium* spp.) on cattle. *Agriculture*. 2015;5: 456–474.  
655 doi:10.3390/agriculture5030456
- 656 4. Pfister JA, Gardner DR, Price KW. Grazing risk on tall larkspur-infested ranges. *Rangelands*.  
657 1997;19: 12–15. doi:10.2307/4001275
- 658 5. Darnhofer I, Gibbon D, Dedieu B. Farming Systems Research: an approach to inquiry. In:  
659 Darnhofer I, Gibbon D, Dedieu B, editors. *Farming Systems Research into the 21st Century:*  
660 *The New Dynamic*. Dordrecht: Springer Netherlands; 2012. pp. 3–31. Available:  
661 [http://www.springerlink.com/index/10.1007/978-94-007-4503-2\\_1](http://www.springerlink.com/index/10.1007/978-94-007-4503-2_1)
- 662 6. Provenza F, Pringle H, Revell D, Bray N, Hines C, Teague R, et al. Complex Creative Systems.  
663 *Rangelands*. 2013;35: 6–13. doi:10.2111/RANGELANDS-D-13-00013.1
- 664 7. McLane AJ, Semeniuk C, McDermid GJ, Marceau DJ. The role of agent-based models in  
665 wildlife ecology and management. *Ecol Model*. 2011;222: 1544–1556.  
666 doi:10.1016/j.ecolmodel.2011.01.020
- 667 8. Grimm V. Ten years of individual-based modelling in ecology: what have we learned and what  
668 could we learn in the future? *Ecol Model*. 1999;115: 129–148. doi:10.1016/S0304-  
669 3800(98)00188-4
- 670 9. Grimm V, Revilla E, Berger U, Jeltsch F, Mooij WM, Railsback SF, et al. Pattern-Oriented  
671 Modeling of Agent-Based Complex Systems: Lessons from Ecology. *Science*. 2005;310: 987–  
672 991. doi:10.1126/science.1116681
- 673 10. Northrop RB. *Introduction to Complexity and Complex Systems*. CRC Press; 2010.
- 674 11. Dumont B, Hill DRC. Spatially explicit models of group foraging by herbivores: what can  
675 Agent-Based Models offer? *Anim Res*. 2004;53: 419–428. doi:10.1051/animres:2004028
- 676 12. Funtowicz SO, Ravetz JR. Science for the post-normal age. *Futures*. 1993;25: 739–755.  
677 doi:10.1016/0016-3287(93)90022-L
- 678 13. Bailey DW, Provenza FD. Mechanisms Determining Large-Herbivore Distribution. In: Prins  
679 HHT, Langevelde FV, editors. *Resource Ecology*. Springer Netherlands; 2008. pp. 7–28.  
680 doi:10.1007/978-1-4020-6850-8\_2

- 681 14. Distel RA, Laca EA, Griggs TC, Demment MW. Patch selection by cattle: maximization of  
682 intake rate in horizontally heterogeneous pastures. *Appl Anim Behav Sci.* 1995;45: 11–21.  
683 doi:10.1016/0168-1591(95)00593-H
- 684 15. Laca EA, Distel RA, Criggs TC, Demment MW. Effects of Canopy Structure on Patch  
685 Depression by Grazers. *Ecology.* 1994;75: 706–716. doi:10.2307/1941728
- 686 16. Sato S. Leadership during actual grazing in a small herd of cattle. *Appl Anim Ethol.* 1982;8:  
687 53–65. doi:10.1016/0304-3762(82)90132-8
- 688 17. Shiyomi M. How are distances between grazing cows determined: A case study. *Appl Entomol*  
689 *Zool.* 2004;39: 575–581. doi:10.1303/aez.2004.575
- 690 18. WallisDeVries MF, Laca EA, Demment MW. From feeding station to patch: scaling up food  
691 intake measurements in grazing cattle. *Appl Anim Behav Sci.* 1998;60: 301–315.  
692 doi:10.1016/S0168-1591(98)00158-0
- 693 19. Augusiak J, Van den Brink PJ, Grimm V. Merging validation and evaluation of ecological  
694 models to ‘evaluation’: A review of terminology and a practical approach. *Ecol Model.*  
695 2014;280: 117–128. doi:10.1016/j.ecolmodel.2013.11.009
- 696 20. Grimm V, Martin BT. Mechanistic effect modeling for ecological risk assessment: Where to go  
697 from here? *Integr Environ Assess Manag.* 2013;9: e58–e63. doi:10.1002/ieam.1423
- 698 21. Green BT, Welch KD, Pfister JA, Chitko-McKown CG, Gardner DR, Panter KE. Mitigation  
699 of Larkspur Poisoning on Rangelands Through the Selection of Cattle. *Rangelands.* 2014;36:  
700 10–15. doi:10.2111/RANGELANDS-D-13-00031.1
- 701 22. Pfister JA, Gardner DR, Panter KE. Consumption of Low Larkspur (*Delphinium*  
702 *nuttallianum*) by Grazing Sheep. *Rangel Ecol Manag.* 2010;63: 263–266. doi:10.2111/REM-D-  
703 09-00084.1
- 704 23. Pfister JA, Manners GD, Ralphs MH, Hong ZX, Lane MA. Effects of Phenology, Site, and  
705 Rumen Fill on Tall Larkspur Consumption by Cattle. *J Range Manag.* 1988;41: 509–514.  
706 doi:10.2307/3899528
- 707 24. Ralphs MH, Olsen JD, Pfister JA, Manners GD. Plant-animal interactions in larkspur  
708 poisoning in cattle. *J Anim Sci.* 1988;66: 2334–2342.
- 709 25. Pfister JA, Provenza FD, Panter KE, Stegelmeier BL, Launchbaugh KL. Risk Management to  
710 Reduce Livestock Losses from Toxic Plants. *J Range Manag.* 2002;55: 291–300.  
711 doi:10.2307/4003137
- 712 26. Pfister JA, Provenza FD, Manners GD, Gardner DR, Ralphs MH. Tall Larkspur Ingestion:  
713 Can Cattle Regulate Intake Below Toxic Levels? *J Chem Ecol.* 1997;23: 759–777.  
714 doi:10.1023/B:JOEC.0000006409.20279.59
- 715 27. Smith MA, Waggoner, Jr. JW, Sims S. Larkspur: Managing grazing to avoid poisoning cattle.  
716 University of Wyoming Cooperative Extension; 2010 Jul. Report No.: MP-111.13.

- 717 28. Panter KE, Manners GD, Stegelmeier BL, Lee S, Gardner DR, Ralphs MH, et al. Larkspur  
718 poisoning: toxicology and alkaloid structure–activity relationships. *Biochem Syst Ecol.* 2002;30:  
719 113–128. doi:10.1016/S0305-1978(01)00123-5
- 720 29. Grina JA, Schroeder DR, Wydallis ET, Stermitz FR. Alkaloids from *Delphinium geyeri*. Three  
721 new C20-diterpenoid alkaloids. *J Org Chem.* 1986;51: 390–394. doi:10.1021/jo00353a023
- 722 30. Grimm V, Berger U, DeAngelis DL, Polhill JG, Giske J, Railsback SF. The ODD protocol: A  
723 review and first update. *Ecol Model.* 2010;221: 2760–2768.  
724 doi:10.1016/j.ecolmodel.2010.08.019
- 725 31. Allen VG, Batello C, Berretta EJ, Hodgson J, Kothmann M, Li X, et al. An international  
726 terminology for grazing lands and grazing animals. *Grass Forage Sci.* 2011;66: 2–28.  
727 doi:10.1111/j.1365-2494.2010.00780.x
- 728 32. Shiyomi M, Tsuiki M. Model for the spatial pattern formed by a small herd in grazing cattle.  
729 *Ecol Model.* 1999;119: 231–238. doi:10.1016/S0304-3800(99)00059-9
- 730 33. Wilensky U. Netlogo 6.01 [Internet]. Evanston, IL: Center for Connected Learning and  
731 Computer-Based Modeling, Northwestern University; 1999. Available:  
732 <http://ccl.northwestern.edu/netlogo>
- 733 34. Grimm V. Visual Debugging: A Way of Analyzing, Understanding and Communicating  
734 Bottom-up Simulation Models in Ecology. *Nat Resour Model.* 2002;15: 23–38.  
735 doi:10.1111/j.1939-7445.2002.tb00078.x
- 736 35. Hexagon Geospatial. ERDAS IMAGINE 2016. Madison, Alabama; 2016.
- 737 36. Huete AR. A soil-adjusted vegetation index (SAVI). *Remote Sens Environ.* 1988;25: 295–309.  
738 doi:10.1016/0034-4257(88)90106-X
- 739 37. ESRI. ArcGIS Desktop 10.4. Redlands, CA: ESRI; 2015.
- 740 38. ESRI. Collector for ArcGIS 17.01. Redlands, CA: ESRI; 2017.
- 741 39. Bonham CD. *Measurements for Terrestrial Vegetation*. Wiley; 1989.
- 742 40. Bailey DW. Daily selection of feeding areas by cattle in homogeneous and heterogeneous  
743 environments. *Appl Anim Behav Sci.* 1995;45: 183–200. doi:10.1016/0168-1591(95)00586-H
- 744 41. Harris NR, Johnson DE, McDougald NK, George MR. Social Associations and Dominance of  
745 Individuals in Small Herds of Cattle. *Rangel Ecol Manag.* 2007;60: 339–349. doi:10.2111/1551-  
746 5028(2007)60[339:SAADOI]2.0.CO;2
- 747 42. Welch KD, Green BT, Gardner DR, Cook D, Pfister JA. The effect of administering multiple  
748 doses of tall larkspur (*Delphinium barbeyi*) to cattle. *J Anim Sci.* 2015;93: 4181.  
749 doi:10.2527/jas.2015-9101

- 750 43. National Research Council. Nutrient Requirements of Beef Cattle: Seventh Revised Edition:  
751 Update 2000 [Internet]. Washington, D.C.: National Academies Press; 2000.  
752 doi:10.17226/9791
- 753 44. Holechek JL, Pieper RD, Herbel CH. Range management: principles and practices. 6th ed.  
754 Pearson Education, Inc.; 2011.
- 755 45. Augustine DJ, Derner JD. Controls over the strength and timing of fire-grazer interactions in a  
756 semi-arid rangeland. *J Appl Ecol*. 2014;51: 242–250. doi:10.1111/1365-2664.12186
- 757 46. Senft RL, Coughenour MB, Bailey DW, Rittenhouse LR, Sala OE, Swift DM. Large Herbivore  
758 Foraging and Ecological Hierarchies. *BioScience*. 1987;37: 789–799. doi:10.2307/1310545
- 759 47. Lazo A. Social segregation and the maintenance of social stability in a feral cattle population.  
760 *Anim Behav*. 1994;48: 1133–1141. doi:10.1006/anbe.1994.1346
- 761 48. Green BT, Welch KD, Gardner DR, Stegelmeier BL, Davis TZ, Cook D, et al. Serum  
762 elimination profiles of methylxanthines and deltamethrin in cattle following oral administration  
763 of larkspur (*Delphinium barbeyi*). *Am J Vet Res*. 2009;70: 926–931. doi:10.2460/ajvr.70.7.926
- 764 49. Gardner DR, Pfister JA. Toxic alkaloid concentrations in *Delphinium nuttallianum*,  
765 *Delphinium andersonii*, and *Delphinium geyeri* in the Intermountain Region. *Rangel Ecol*  
766 *Manag*. 2007;60: 441–446. doi:10.2111/1551-5028(2007)60[441:TACIDN]2.0.CO;2
- 767 50. SAS Institute. JMP. Cary, NC: SAS Institute, Inc.; 2016.
- 768 51. R Core Team. R: a language for statistical computing [Internet]. Vienna, Austria: R Foundation  
769 for Statistical Computing; 2017. Available: <https://www.R-project.org>
- 770 52. Google/Open source. OpenRefine 2.8 [Internet]. 2017. Available:  
771 <http://openrefine.org/index.html>
- 772 53. Faraway JJ. Extending the Linear Model with R: Generalized Linear, Mixed Effects and  
773 Nonparametric Regression Models, Second Edition. CRC Press; 2016.
- 774 54. Hilbe JM. Negative Binomial Regression. Cambridge University Press; 2011.
- 775 55. Anderson DR. Model based inference in the life sciences: a primer on evidence. New York ;  
776 London: Springer; 2008.
- 777 56. Hart RH, Bissio J, Samuel MJ, J. W. Waggoner J. Grazing Systems, Pasture Size, and Cattle  
778 Grazing Behavior, Distribution and Gains. *J Range Manag*. 1993;46: 81–87.  
779 doi:10.2307/4002452
- 780 57. Galyean ML, Gunter† SA. Predicting forage intake in extensive grazing systems. *J Anim Sci*.  
781 2016;94: 26–43. doi:10.2527/jas.2016-0523
- 782 58. Cordova FJ, Wallace JD, Pieper RD. Forage Intake by Grazing Livestock: A Review. *J Range*  
783 *Manag*. 1978;31: 430–438. doi:10.2307/3897201

- 784 59. Walker JW, Heitschmidt RK, Dowhower SL. Evaluation of Pedometers for Measuring  
785 Distance Traveled by Cattle on Two Grazing Systems. *J Range Manag.* 1985;38: 90–93.  
786 doi:10.2307/3899343
- 787 60. Nielsen DB, Ralphs MH, Evans JO, Call CA. Economic feasibility of controlling tall larkspur  
788 on rangelands. *J Range Manag Arch.* 1994;47: 369–372.
- 789 61. Anderson DM, Estell RE, Holechek JL, Ivey S, Smith GB. Virtual herding for flexible  
790 livestock management – a review. *Rangel J.* 2014;36: 205–221. doi:10.1071/RJ13092
- 791 62. Allen CR, Holling CS. *Discontinuities in Ecosystems and Other Complex Systems.* Columbia  
792 University Press; 2008.
- 793 63. Barnes M. *Livestock Management for Coexistence with Large Carnivores, Healthy Land and*  
794 *Productive Ranches.* Keystone Conservation; 2015.
- 795 64. Bailey DW, Trotter MG, Knight CW, Thomas MG. Use of GPS tracking collars and  
796 accelerometers for rangeland livestock production research. *J Anim Sci.* 2017;95: 360–360.  
797 doi:10.2527/asasann.2017.740
- 798 65. Ralphs MH, Jensen DT, Pfister JA, Nielsen DB, James LF. Storms Influence Cattle to Graze  
799 Larkspur: An Observation. *J Range Manag.* 1994;47: 275–278. doi:10.2307/4002547
- 800 66. Provenza FD. Twenty-five years of paradox in plant-herbivore interactions and "sustainable"  
801 grazing management. *Rangel Arch.* 2003;25: 4–15.
- 802 67. Provenza FD, Villalba JJ, Dziba LE, Atwood SB, Banner RE. Linking herbivore experience,  
803 varied diets, and plant biochemical diversity. *Small Rumin Res.* 2003;49: 257–274.  
804 doi:10.1016/S0921-4488(03)00143-3

805
